# Supplementary material for: Liquid crystalline nanoparticles encapsulating cisplatin and docetaxel combination for targeted therapy of breast cancer
Source: Royal Society of Chemistry journal article supplement (doi:10.1039/c6bm00376a), 2016-01-01
Supplement: c6bm00376a1.pdf [file c6bm00376a1.pdf]

†Electronic Supplementary Information

**Liquid crystalline nanoparticles encapsulating cisplatin and docetaxel  
combination for targeted therapy of breast cancer**

Raj Kumar Thapa,<sup>a</sup> Ju Yeon Choi,<sup>a</sup> Biki Gupta,<sup>a</sup> Thiruganesh Ramasamy,<sup>a</sup> Bijay Kumar Poudel,<sup>a</sup>  
Sae Kwang Ku,<sup>b</sup> Yu Seok Youn,<sup>c</sup> Han Gon Choi,<sup>\*d</sup> Chul Soon Yong,<sup>\*a</sup> and Jong Oh Kim,<sup>\*a</sup>

<sup>a</sup>College of Pharmacy, Yeungnam University, 280 Daehak-Ro, Gyeongsan, Gyeongsanbuk-do,  
712-749, South Korea. E-mail: [csyong@yu.ac.kr](mailto:csyong@yu.ac.kr), [jongohkim@yu.ac.kr](mailto:jongohkim@yu.ac.kr)

<sup>b</sup>College of Korean Medicine, Daegu Haany University, Gyeongsan, 712-702, South Korea

<sup>c</sup>School of Pharmacy, SungKyunKwan University, 300 Cheoncheon-dong, Jangan-gu, Suwon,  
440-746, South Korea

<sup>d</sup>College of Pharmacy, Hanyang University, 55, Hanyangdaehak-ro, Sangnok-gu, Ansan 426-  
791, South Korea. E-mail: [hangon@hanyang.ac.kr](mailto:hangon@hanyang.ac.kr)

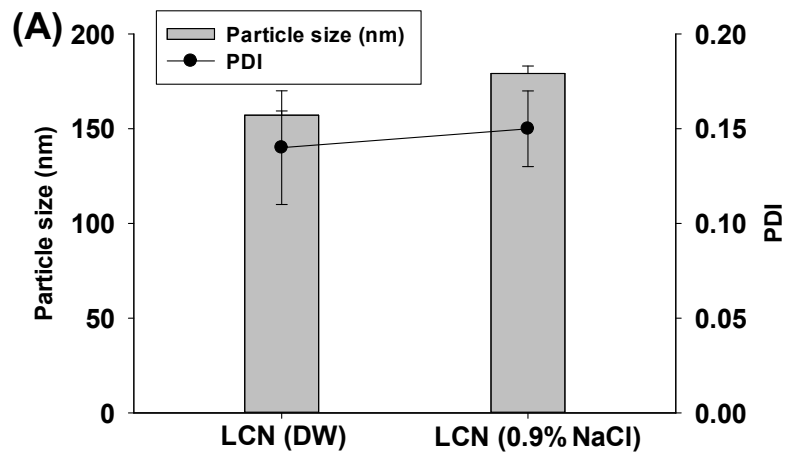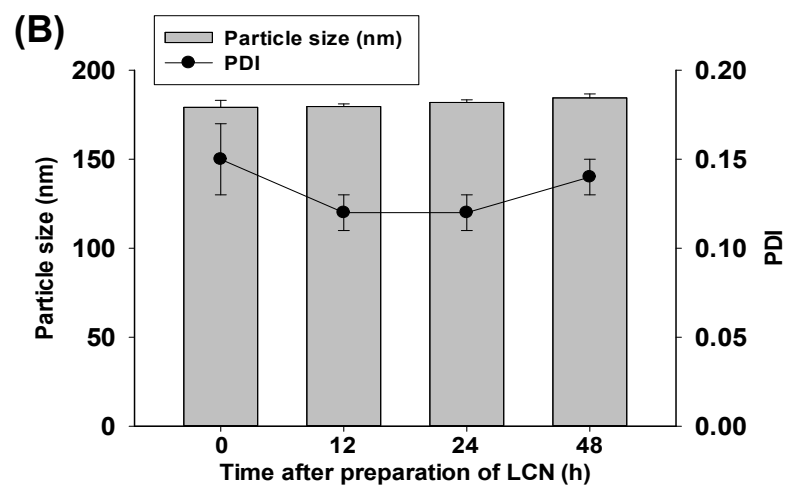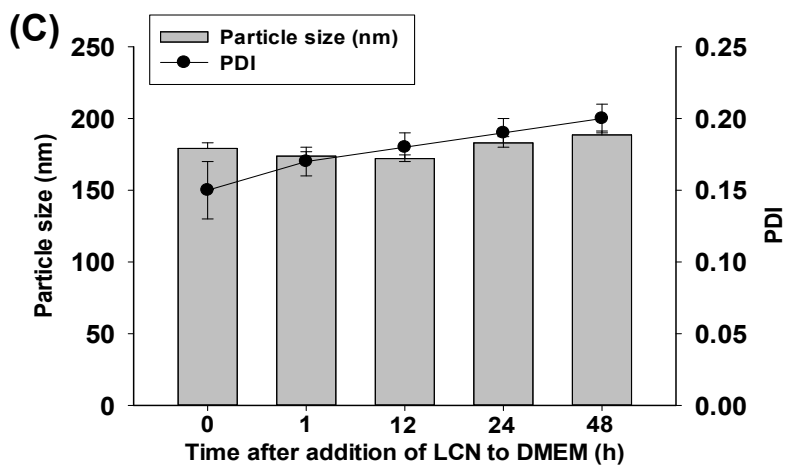

**Fig. S1** (A) Effect of 0.9% NaCl solution on the particle size and PDI of LCN; (B) storage stability of the LCN prepared using 0.9% NaCl solution; and (C) effect of DMEM on particle size and PDI of LCN.

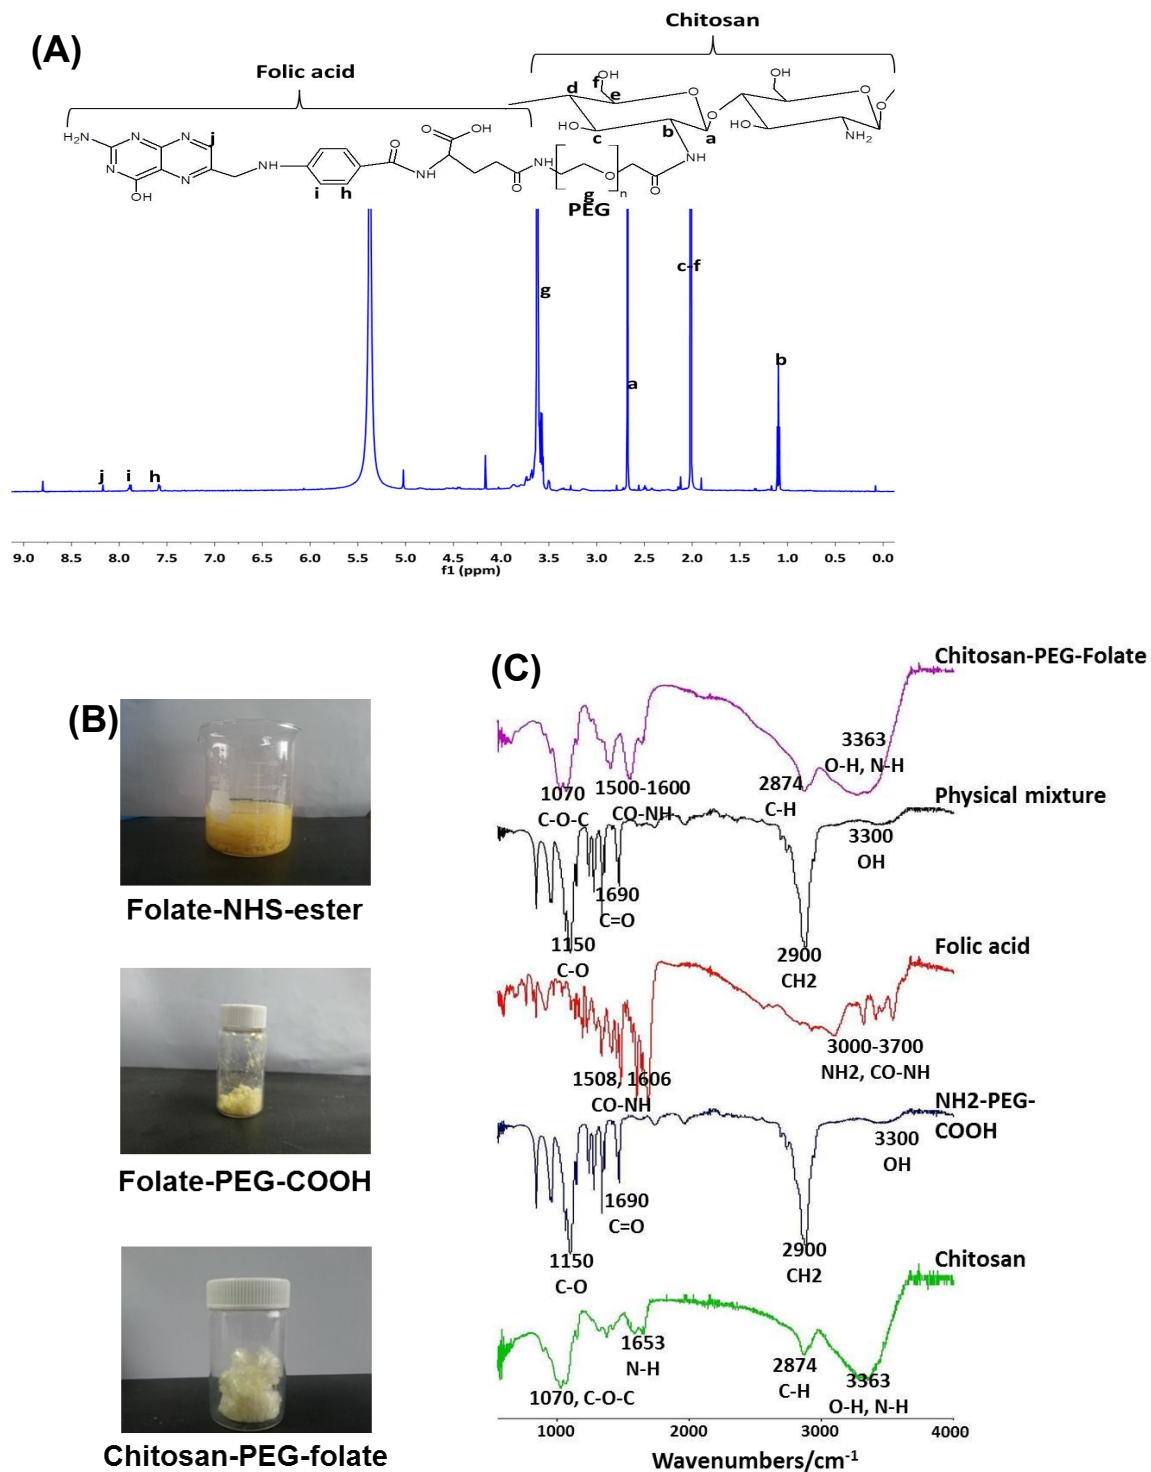

**Fig. S2** (A)  $^1\text{H-NMR}$  spectra of Chi-PEG-FA conjugate; (B) Digital images of prepared intermediates and final conjugate; and (C) FTIR analysis of Chi,  $\text{NH}_2\text{-PEG-COOH}$ , FA, and Chi-PEG-FA.

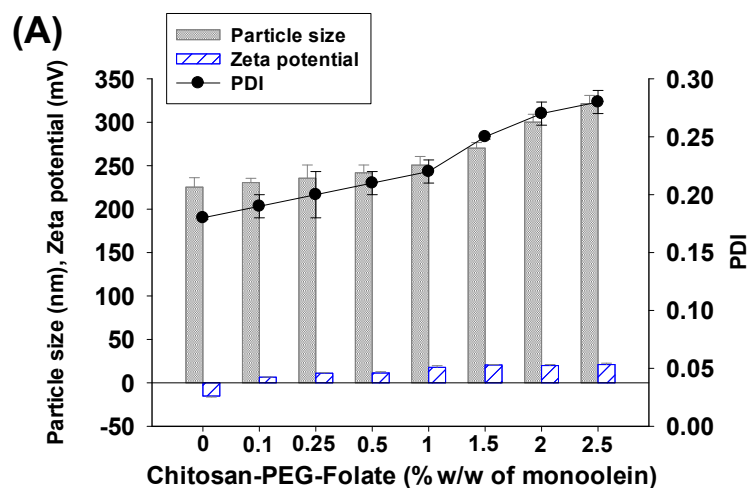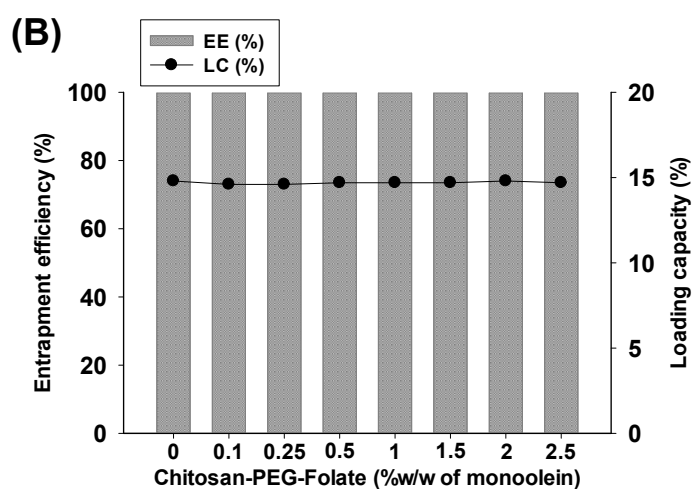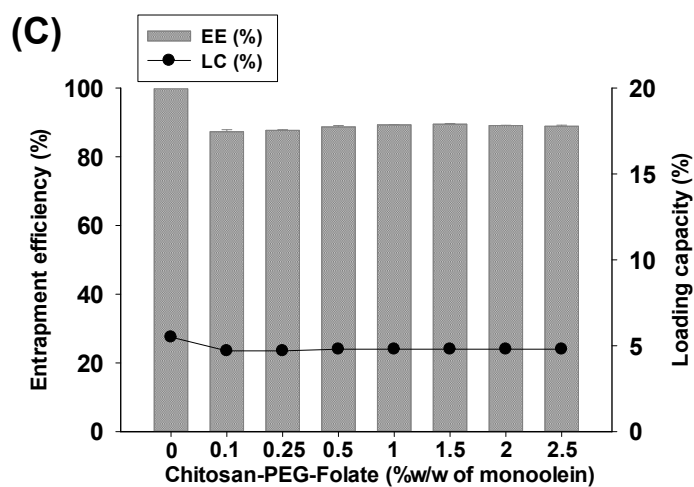

**Fig. S3** Effect of Chi-PEG-FA layering on (A) particle size, PDI and zeta potential of LCN/DC; entrapment efficiency and loading capacity of (B) DOC and (C) CIS.

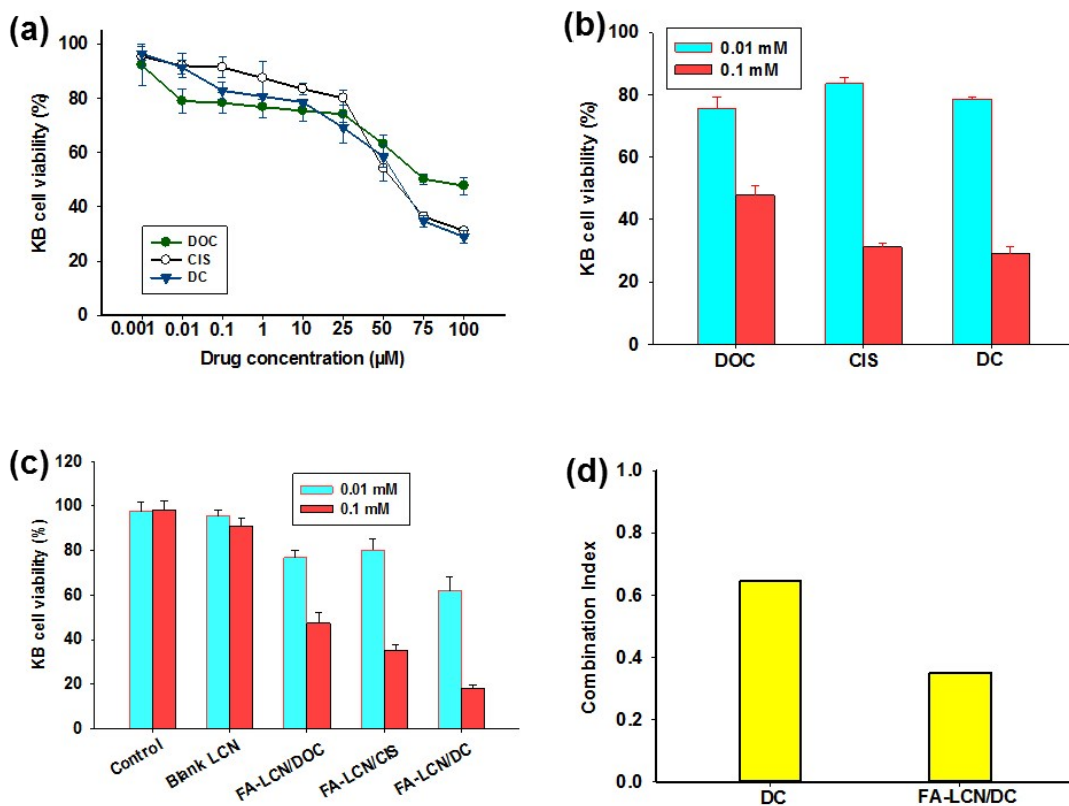

**Fig. S4** (a, b) *In vitro* cell cytotoxicity of DOC, CIS, DC cocktail (DOC:CIS molar ratio 1:1) in KB cells. (c) *In vitro* cell cytotoxicity of blank LCN, FA-LCN/DOC, FA-LCN/CIS and FA-LCN/DC at concentrations of 0.01 and 0.1 mM/ml. (d) Combination index for DC cocktail and FA-LCN/DC. Data are expressed as the mean  $\pm$  SD (n = 8).

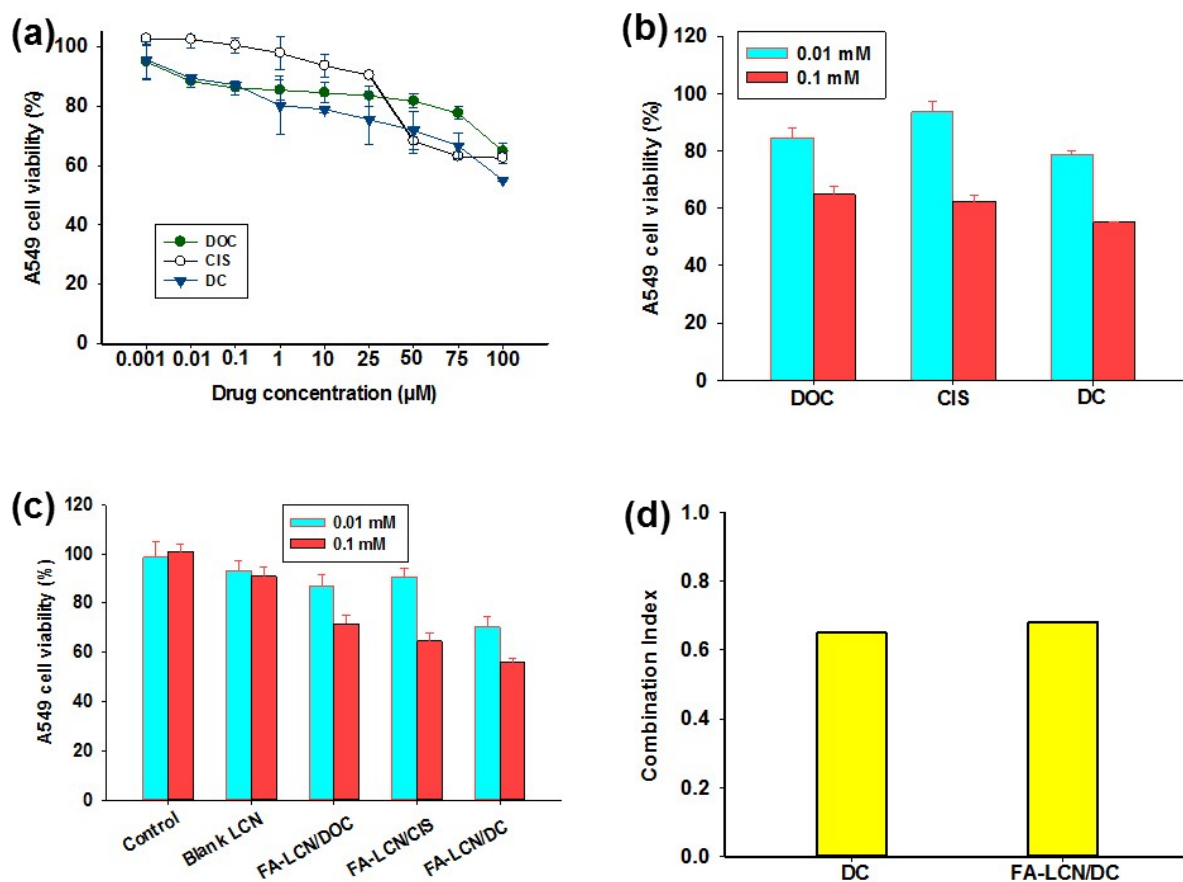

**Fig. S5** (a, b) *In vitro* cell cytotoxicity of DOC, CIS, DC cocktail (DOC:CIS molar ratio 1:1) in A549 cells. (c) *In vitro* cell cytotoxicity of blank LCN, FA-LCN/DOC, FA-LCN/CIS and FA-LCN/DC at concentrations of 0.01 and 0.1 mM/ml. (d) Combination index for DC cocktail and FA-LCN/DC. Data are expressed as the mean  $\pm$  SD ( $n = 8$ ).

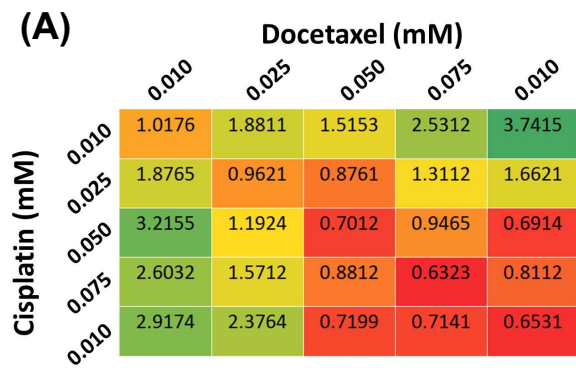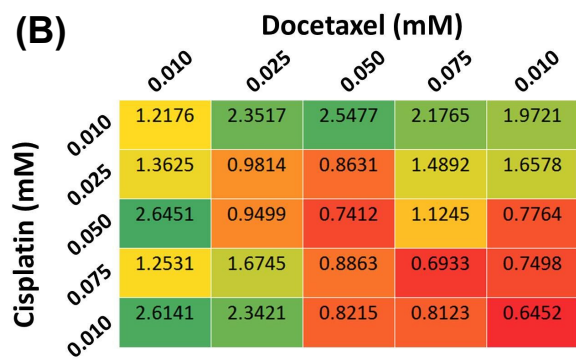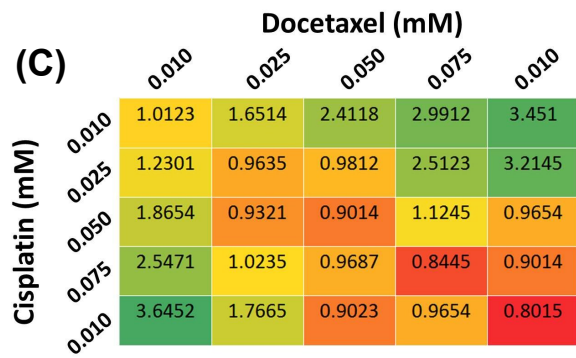

**Fig. S6** Heat map of the combination index (CI) for each combination of DOC and CIS in (A) KB, (B) A549 and (C) MDA-MB-231 cells.
